# Supplementary figures and images for: Five-year follow-up results of aerobic and impact training on bone mineral density in early breast cancer patients
Source: Springer Nature journal article supplement (doi:10.1007/s00198-020-05611-w), 2020-09-04

**The BREX study flowchart**

**
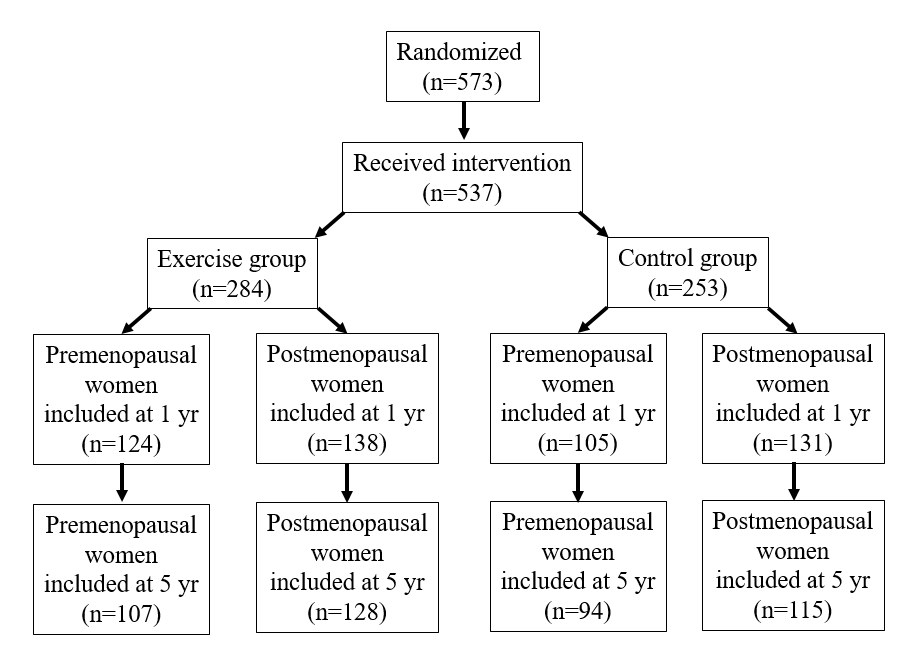
**

Supplement: MOESM2 [file 18348958]
